# Supplementary material
Source: PubMed Central journal article supplement (PMC3412759)
Supplement: f-68-00846-sup1.pdf [file f-68-00846-sup1.pdf]

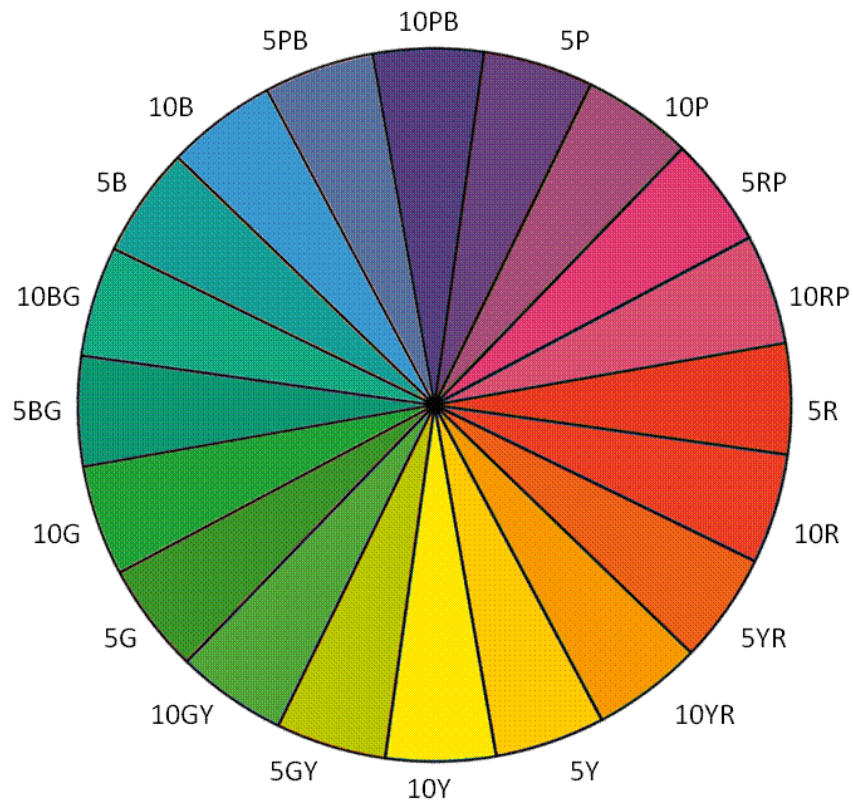

**Supplementary Figure 1.** Munsell colour wheel (Munsell, 1912). Colors opposite each other are complementary. 10R-5R, red ( $\geq 620$  nm); 10Y-5Y, yellow ( $\approx 580$  nm); 10GY, yellow-green (540-550 nm); 5G, green (540-520 nm); 5BG, bluish-green (520-490 nm); 10B-5B, blue ( $\approx 470$  nm); 10PB, purple-blue or violet ( $\leq 460$  nm); 10P-5P, purple.

Reference

Munsell, A.H. (1912). *The American Journal of Psychology* 23, 236–244.
